# Pharmacokinetics of Orally Administered GS-441524 in Dogs

Victoria C. Yan<sup>1\*</sup>, Sunada Khadka<sup>1,2</sup>, Kenisha Arthur<sup>1</sup>, Jeffrey J. Ackroyd<sup>1</sup>, Dimitra K. Georgiou<sup>1</sup>, and Florian L. Muller<sup>1</sup>

<sup>1</sup>Department of Cancer Systems Imaging, University of Texas MD Anderson Cancer Center, Houston, TX, USA

<sup>2</sup>Department of Cancer Biology, University of Texas MD Anderson Cancer Center, Houston, TX, USA

\*Email: [victoriacyanide@gmail.com](mailto:victoriacyanide@gmail.com) Twitter: @victoriacyanide

## Abstract.

Despite being FDA-approved for COVID-19, the clinical efficacy of remdesivir (Veklury<sup>®</sup>) remains contentious. We previously described the pharmacokinetic, pharmacodynamic and toxicological rationales on the greater suitability of its parent nucleoside, GS-441524, for COVID-19 treatment. Here, we assess the oral bioavailability of GS-441524 in beagle dogs and show that plasma concentrations approximately 24-fold higher than the EC<sub>50</sub> against SARS-CoV-2 are easily and safely sustained. These data support translation of GS-441524 as an oral agent for COVID-19.

Remdesivir (RDV) is currently the only FDA-approved anti-viral drug for the treatment of COVID-19 despite exhibiting just modest efficacy in one double-blind, placebo-controlled randomized clinical trial (RCT) (1); other RCTs have thus far found no statistically significant improvement in mortality (2) or time to clinical improvement (3). As a phosphoramidate prodrug of the McGuigan class (4), RDV is structurally susceptible to conversion to its active nucleoside triphosphate (NTP; GS-443902) form by enzymes that are abundant in the liver (CES1/CTSA/HINT1) but minimally expressed in alveolar type 2 cells (AT2) (5), the cell type most susceptible to SARS-CoV-2 infection (6). Preferential liver metabolism of RDV results in on-target dose limiting toxicity (DLT) that precludes dose escalation despite its modest clinical performance (7, 8). Such shortcomings are exacerbated by the hydrophobic nature of RDV, which requires complex excipients that could implicate kidney function (9, 10). Another major drawback with RDV is its requisite intravenous (IV) administration (11), making outpatient therapy, early intervention, and prophylaxis impractical.

Cognizant of these limitations, we have asserted that the parent nucleoside of RDV, GS-441524, would be better suited for the treatment for COVID-19 (5). GS-441524 is the persistent, predominant metabolite in plasma following IV infusion of RDV in preclinical species (12–14) and in humans with a half-life ( $T_{1/2}$ ) of >24 h (8, 15). The extent to which GS-441524 contributes to the overall anti-SARS-CoV-2 activity of RDV when administered to patients remains unclear. In contrast to RDV, which is preferentially bioconverted to GS-443902 by liver-abundant enzymes (16, 17), GS-441524 is bioconverted to GS-443902 by nucleoside kinases (likely adenosine kinase,

ADK) that are broadly expressed across all tissues. Due to its demonstrably better safety profile (7, 18), a significant advantage that GS-441524 possesses over RDV is the possibility for dose escalation without liver-related DLTs, as this would increase the concentration of bioactive GS-443902 in AT2 cells. Cell-based studies have shown that GS-441524 is a potent inhibitor of SARS-CoV-2-infected cells, with  $EC_{50}$  values on the same order of magnitude as that of RDV ( $EC_{50}$ = 0.47-1.09  $\mu$ M) (19). Efficacy studies conducted in cats with natural presentations feline infectious peritonitis (FIP) as a result of infection by the closely related feline coronavirus (FCoV) have demonstrated up to 96% cure rate with subcutaneously (SC) administered GS-441524 (20–22). Efficacy studies conducted in mice infected with either SARS-CoV-2 or murine hepatitis virus (MHV, a closely related coronavirus) have shown that GS-441524 is capable of reducing viral loads in pathologically relevant organs without obvious adverse events (23). Given the scarcity of simple outpatient treatment options for COVID-19 (24), these especially encouraging data warrant translation of GS-441524 to the clinic. Here, we provide pharmacokinetic (PK) evidence in dogs supporting the ability for GS-441524 to be investigated as an oral agent for COVID-19.

To validate our assertion that McGuigan prodrugs such as RDV are heavily subject to first-pass metabolism, we first conducted a single-dose, equimolar comparison between orally (PO) administered GS-441524 (6.5 mg/kg) and RDV (13 mg/kg) in dogs. Male beagles (N=1 per group) were administered excipient-less capsule formulations of either GS-441524 or RDV and plasma concentrations of GS-441524 were evaluated at predetermined timepoints (**Figure 1a**). No adverse events were observed in either

dosing group. As expected, plasma concentrations of GS-441524 following administration of RDV were poor, with  $C_{max}$  values roughly 25-fold lower than that observed when GS-441524 was administered directly (172 vs. 4580 ng/mL, respectively; **Figure 1a, c, Supplementary Data File 1**). Interestingly, there was an observable difference in  $T_{max}$  values, with plasma concentrations of GS-441524 peaking at approximately 3 h following RDV administration versus 1 h following direct dosing of GS-441524. This shift in  $T_{max}$  values with RDV PO administration suggests a mechanism of systemic release similar to that observed for the McGuigan prodrug sofosbuvir, wherein rapid hepatic extraction of intact prodrug forms a reservoir of active NTP and hydrolyzed nucleoside—the latter of which is then slowly released into systemic circulation (25). Given that plasma concentrations of GS-441524 following RDV administration are below the range of reported anti-SARS-CoV-2  $EC_{50}$  values and that long-term PO dosing of RDV at 13 mg/kg is almost certainly therapeutically prohibitive in humans due to hepatotoxicity concerns (8), these data allude to the infeasibility of administering RDV PO for COVID-19. At the same time, we find that direct PO administration of GS-441524 results in plasma concentration exceeding the range of reported anti-SARS-CoV-2  $EC_{50}$  values for at least 8 h (**Figure 1a, Supplementary Data File 1**). Peak concentrations of GS-441524 reached 15.45  $\mu$ M and were obtained at approximately 1 h (**Figure 1a, c**), indicating high oral absorption of GS-441524 in dog even in the absence of excipients.

Prior studies assessing the oral bioavailability (OBV, F%) of GS-441524 in dogs following both IV (2 mg/kg) and PO (5 mg/kg) administration have found that the drug is

efficiently absorbed, with an OBV of 85% (NCATS OpenData Portal). Such studies examined PO absorption of GS-441524 using a solution formulation prepared at a final concentration of 2.5 mg/mL. We sought to determine whether similarly favorable F% could be achieved using an excipient-less capsule formulation, which would greatly ease outpatient administration. The wide range of F% observed in other preclinical species (**Table 1**; NCATS OpenData Portal) and the unusual solubility properties of GS-441524 are reminiscent of that observed with the FDA-approved nucleoside analogue acyclovir (**Table 1**), which was ultimately formulated as an excipient-less tablet (26). Direct comparison of PK parameters between solution and capsule formulations of GS-441524 indicates a similar pattern of high drug absorption, with  $T_{max}$  values of 0.5 and 1 h, respectively (**Figure 1b**). Between solution and capsule formulations, PK parameters were generally similar; it should be noted that the capsule dose was slightly higher than the solution dose (5 mg/kg vs. 6.5 mg/kg). Adjusting for sampling timeframes, these data indicate that the  $C_{max}$  value was higher with the solution formulation (5060 vs. 4580 ng/mL) but the AUC value were somewhat higher with the capsule formulation (17916 vs. 19151 ng/mL; **Figure 1c**). Such observations appear consistent with the general observation that liquid formulations tend to be more readily absorbed than their pill counterparts (27). Nevertheless, the estimated OBV using this capsule formulation remains high at about 76% (**Figure 1b**). These data hint at the feasibility of using an excipient-less pill formulation for GS-441524 for outpatient treatment.

There are some limitations associated with this study. First, the sample size in the capsule study is small, which may not capture possible variability associated with this

formulation. Second, nucleoside analogues generally tend to exhibit higher OBV in dogs than in other preclinical species perhaps due to the presence of a paracellular nucleoside transporter that is absent in humans and non-human primates (28). As a result, the OBV of nucleoside analogues in dogs tends to overestimate that observed in humans (**Supplementary Data File 2**). While not specifically explored in this study, it should be noted that—at the other end of the OBV spectrum—OBV of nucleoside analogues in non-human primates tend to under-predict that observed in humans (**Supplementary Data File 3**). Nevertheless, these data suggest the feasibility of using a simple, excipient-less capsule formulation of GS-441524. As a prodrug inhibitor of the SARS-CoV-2 RNA-dependent RNA polymerase (RdRp), GS-441524 is aptly poised to demonstrate consistent efficacy among new mutations of SARS-CoV-2, as RdRp is much less susceptible to efficacy-altering mutations than is the spike protein (29, 30). Thus, clinical translation of GS-441524 is imperative.

139

# 140 *Drug formulation.*

141 For capsule studies, GS-441524 and RDV were purchased at the highest commercially  
142 available quality from MedKoo Biosciences; purity was verified by ultra-performance  
143 liquid chromatography mass spectrometry (UPLC-MS) and nuclear magnetic resonance  
144 (NMR) spectroscopy ( $^1\text{H}$ ,  $^{13}\text{C}$ ) in-house. For capsule studies, gelatin capsules (size 5,  
145 XPRS Nutra) were tightly packed with either GS-441524 (65 mg) or RDV (136.74 mg)  
146 without additional excipients. For solution studies, GS-441524 was purchased at the  
147 highest commercially available from AK Scientific and characterized by NCATS.  
148 Formulations for PO and IV studies conducted by NCATS are described on the NCATS  
149 OpenData Portal. Briefly, GS-441524 was dissolved in a solution containing 5% ethanol,  
150 30% propylene glycol, 45% PEG-400, 20% water with 1 equivalent HCl for a final  
151 concentration of 2.5 mg/mL.

152

# 153 *Single dose GS-441524 and RDV in dogs via capsule formulation.*

154 All capsule form studies were performed at Charles River Laboratories (Wilmington, MA)  
155 with IACUC approval (#20236536). Fasted male adult beagles (10 kg; N=1 per  
156 compound) were administered either GS-441524 (6.5 mg/kg) or RDV (13 mg/kg).  
157 Plasma samples were taken for PK analysis at the following timepoints (h): -0.5, 0.5, 1,  
158 3, 6, 8, 24. Animals were monitored continuously by veterinarians for any clinically  
159 relevant abnormalities during dosing and sample collection. PO solution and IV studies  
160 were performed by NCATS as described on the NCATS OpenData Portal with relevant

committee and regulatory approval. Data from all studies were (re-)analyzed using PKSolver 2.0 and graphs were generated using GraphPad Prism 8.

#### *Plasma pharmacokinetics*

For capsule studies, plasma levels of GS-441524 were analyzed at Covance, Inc (Princeton, NJ) on a fee-for-service basis using a liquid chromatography mass spectrometry (LC-MS) assay previously described for quantification of GS-441524 following IV administration of RDV in NHP (12).

#### **Author Contributions.**

V.C.Y. analyzed data and wrote the manuscript. S.K., K.A., D.K.G., and J.J.A. provided technical assistance. V.C.Y. and F.L.M. conceived and oversaw the study.

#### **Acknowledgements.**

This work was supported by the COVID-19 Early Treatment Fund (CETF). S.K. is supported by the MD Anderson CPRIT Research Training Program Grant (RP170067) and the Larry Deaven PhD Fellowship in Biomedical Sciences. We thank Gilead Sciences for permission to use their assay established at Covance, Inc. to quantify GS-441524 in plasma and NCATS for conducting PK studies.



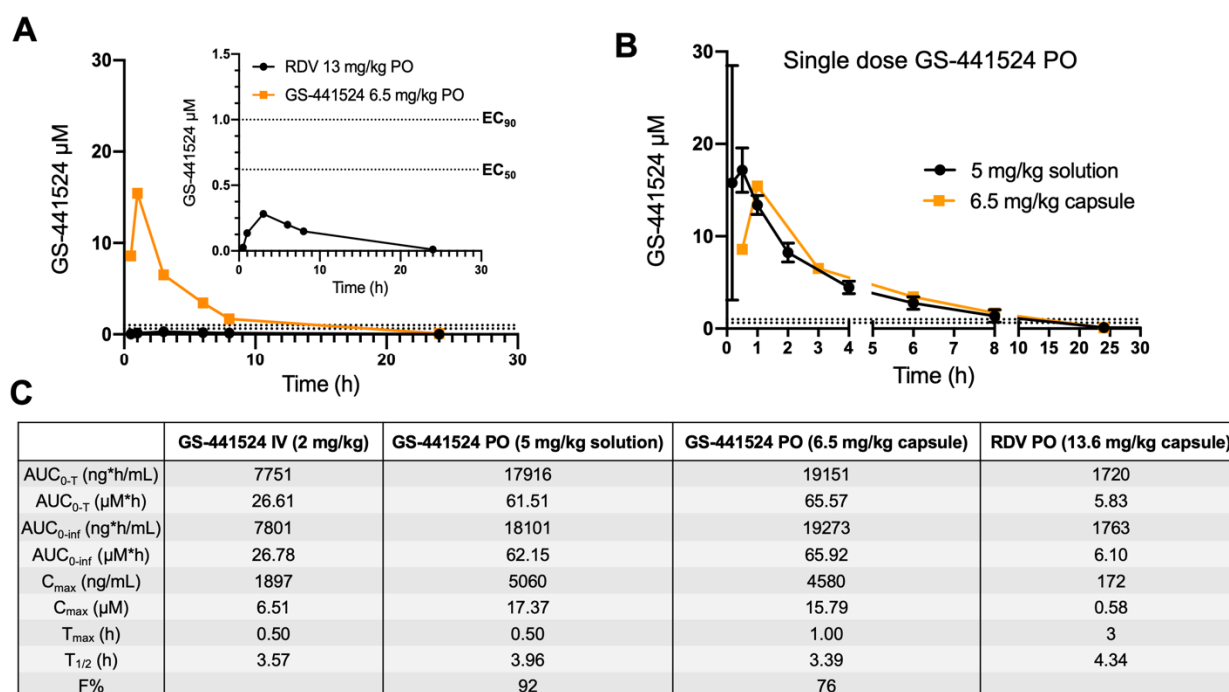

**Figure 1. Plasma concentrations of GS-441524 following a single oral dose of remdesivir or GS-441524 in dogs. (A)** Head-to-head PK comparison following a single equimolar dose of remdesivir (black, 13.6 mg/kg) and GS-441524 (orange, 6.5 mg/kg) in male beagle dogs (N=1 per compound). Both compounds were administered in capsule form. Plasma concentrations of GS-441524 following compound administration are plotted for the following timepoints (h): 0.5, 1, 3, 6, 8, 24. A focused view of GS-441524 concentrations following oral administration of remdesivir is shown in top right corner. **(B)** Comparison of plasma concentrations of GS-441524 following oral administration as a solution (black, 5 mg/kg; N=3) or as a capsule (orange, 6.5 mg/kg; N=1). **(C)** Mean PK parameters following various routes of administration of GS-441524 and RDV. Raw values for GS-441524 dosed IV and PO dosed as a solution are adapted from NCATS OpenData Portal and have been re-calculated to match the

sampling timeframe of the capsule studies (T=0.5-24 h). All PK parameters were calculated using PKSolver 2.0. In panels A and B, dotted lines correspond to EC<sub>50</sub> (bottom) and EC<sub>90</sub> (top) values reported for GS-441524 in SARS-CoV-2-infected Calu3 cells (19).

| Species, F% | Acyclovir | GS-441524 |
|-------------|-----------|-----------|
| Human       | 10-20     | 15-30*    |
| Monkey      | 3.7       | 8.3       |
| Dog         | 54-90     | 85-93     |

**Table 1. Oral bioavailabilities of acyclovir and GS-441524 in preclinical species are similar.** GS-441524 exhibits a similar pattern of F% as acyclovir across preclinical species. F% for GS-441524 were obtained from the NCATS OpenData Portal and F% for acyclovir were obtained from the FDA fact sheet on Zovirax (human), Laskin et al. Clin. Pharm. (1983, monkey) (31) and Krasny et al. *J. Pharm. Exp. Ther.* (1981, dog) (32). \*Anticipated F% of GS-441524 in humans.

# References.

1. Beigel JH, Tomashek KM, Dodd LE, Mehta AK, Zingman BS, Kalil AC, Hohmann E, Chu HY, Luetkemeyer A, Kline S, Lopez de Castilla D, Finberg RW, Dierberg K, Tapson V, Hsieh L, Patterson TF, Paredes R, Sweeney DA, Short WR, Touloumi G, Lye DC, Ohmagari N, Oh M, Ruiz-Palacios GM, Benfield T, Fätkenheuer G, Kortepeter MG, Atmar RL, Creech CB, Lundgren J, Babiker AG, Pett S, Neaton JD, Burgess TH, Bonnett T, Green M, Makowski M, Osinusi A, Nayak S, Lane HC. 2020. Remdesivir for the Treatment of Covid-19 — Final Report. N Engl J Med <https://doi.org/10.1056/NEJMoa2007764>.
2. WHO Solidarity Trial Consortium. 2020. Repurposed Antiviral Drugs for Covid-19 - Interim WHO Solidarity Trial Results. N Engl J Med 1–15.
3. Wang Y, Zhang D, Du G, Du R, Zhao J, Jin Y, Fu S, Gao L, Cheng Z, Lu Q, Hu Y, Luo G, Wang K, Lu Y, Li H, Wang S, Ruan S, Yang C, Mei C, Wang Y, Ding D, Wu F, Tang X, Ye X, Ye Y, Liu B, Yang J, Yin W, Wang A, Fan G, Zhou F, Liu Z, Gu X, Xu J, Shang L, Zhang Y, Cao L, Guo T, Wan Y, Qin H, Jiang Y, Jaki T, Hayden FG, Horby PW, Cao B, Wang C. 2020. Remdesivir in adults with severe COVID-19: a randomised, double-blind, placebo-controlled, multicentre trial. Lancet 395:1569–1578.
4. McGuigan C, Devine KG, O'onnor TJ, Galpin SA, Jeffries DJ, Kinchington D. 1990. Synthesis and evaluation of some novel phosphoramidate derivatives of 3'-azido-3'-deoxythymidine (AZT) as anti-HIV compoundsAntiviral Chemistry &

Chemotherapy.

5. Yan VC, Muller FL. 2020. Advantages of the Parent Nucleoside GS-441524 over Remdesivir for Covid-19 Treatment. ACS Med Chem Lett 11:1361–1366.
6. Schaefer I-M, Padera RF, Solomon IH, Kanjilal S, Hammer MM, Hornick JL, Sholl LM. 2020. In situ detection of SARS-CoV-2 in lungs and airways of patients with COVID-19. Mod Pathol 33:2104–2114.
7. Xu Y, Barauskas O, Kim C, Babusis D, Murakami E, Korniyev D, Lee G, Stepan G, Perron M, Bannister R, Schultz BE, Sakowicz R, Porter D, Cihlar T, Feng JY. 2020. Off-target In Vitro Profiling Demonstrates that Remdesivir Is a Highly Selective Antiviral Agent. Antimicrob Agents Chemother <https://doi.org/10.1128/aac.02237-20>.
8. Humeniuk R, Mathias A, Cao H, Osinusi A, Shen G, Chng E, Ling J, Vu A, German P. 2020. Safety, Tolerability, and Pharmacokinetics of Remdesivir, An Antiviral for Treatment of COVID-19, in Healthy Subjects. Clin Transl Sci cts.12840.
9. Yan VC, Muller FL. 2020. Captisol and GS-704277, but not GS-441524, are credible mediators of remdesivir's nephrotoxicity. Antimicrob Agents Chemother 64:01920–1920.
10. European Medicines Agency. 2020. Remdesivir: Summary on compassionate use EMA/178637/2020 - Rev. 1.
11. Food and Drug Administration. 2020. VEKLURY® (remdesivir).
12. Warren TK, Jordan R, Lo MK, Ray AS, Mackman RL, Soloveva V, Siegel D, Perron M, Bannister R, Hui HC, Larson N, Strickley R, Wells J, Stuthman KS, Van

Tongeren SA, Garza NL, Donnelly G, Shurtleff AC, Retterer CJ, Gharaibeh D,  
Zamani R, Kenny T, Eaton BP, Grimes E, Welch LS, Gomba L, Wilhelmsen CL,  
Nichols DK, Nuss JE, Nagle ER, Kugelman JR, Palacios G, Doerffler E, Neville S,  
Carra E, Clarke MO, Zhang L, Lew W, Ross B, Wang Q, Chun K, Wolfe L,  
Babuis D, Park Y, Stray KM, Trancheva I, Feng JY, Barauskas O, Xu Y, Wong P,  
Braun MR, Flint M, McMullan LK, Chen S-S, Fearn R, Swaminathan S, Mayers  
DL, Spiropoulou CF, Lee WA, Nichol ST, Cihlar T, Bavari S. 2016. Therapeutic  
efficacy of the small molecule GS-5734 against Ebola virus in rhesus monkeys.  
Nature 531:381–385.

13. Sheahan TP, Sims AC, Graham RL, Menachery VD, Gralinski LE, Case JB, Leist  
SR, Pyrc K, Feng JY, Trantcheva I, Bannister R, Park Y, Babuis D, Clarke MO,  
Mackman RL, Spahn JE, Palmiotti CA, Siegel D, Ray AS, Cihlar T, Jordan R,  
Denison MR, Baric RS. 2017. Broad-spectrum antiviral GS-5734 inhibits both  
epidemic and zoonotic coronaviruses. Sci Transl Med 9:eaal3653.

14. Williamson BN, Feldmann F, Schwarz B, Meade-White K, Porter DP, Schulz J,  
Van Doremalen N, Leighton I, Yinda CK, Pérez-Pérez L, Okumura A, Lovaglio J,  
Hanley PW, Saturday G, Bosio CM, Anzick S, Barbican K, Cihlar T, Martens C,  
Scott DP, Munster VJ, De Wit E. 2020. Clinical benefit of remdesivir in rhesus  
macaques infected with SARS-CoV-2. Nature 585:273–276.

15. Tempestilli M, Caputi P, Avataneo V, Notari S, Forini O, Scorzoloni L, Marchioni L,  
Bartoli TA, Castillette C, Lalle E, Capobianchi MR, Nicastri E, D'Avolio A, Ippolito  
G, Agrati C. 2020. Pharmacokinetics of remdesivir and GS-441524 in two critically  
ill patients who recovered from COVID-19. J Antimicrob Chemother dkaa239:1–4.

16. Murakami E, Wang T, Babusis D, Lepist E-I, Sauer D, Park Y, Vela JE, Shih R, Birkus G, Stefanidis D, Kim CU, Cho A, Ray AS. 2014. Metabolism and Pharmacokinetics of the Anti-Hepatitis C Virus Nucleotide Prodrug GS-6620. *Antimicrob Agents Chemother* 58:1943–1951.
17. Lawitz E, Hill J, Marbury T, Hazan D, Gruener D, Webster L, Majauskas R, Morrison R, DeMicco M, German P, Stefanidis D, Svaroskaia E, Arterburn S, Ray A, Rossi S, McHutchinson J, Rodriguez-Torres M. 2012. GS-6620, A Liver-Targeted Nucleotide Prodrug, Exhibits Antiviral Activity and Favorable Safety Profile Over 5 Days in Treatment Naïve Chronic HCV Genotype 1 SubjectsEASL 47th Annual Meeting. EASL 47th Annual Meeting, Barcelona.
18. Lo MK, Jordan R, Arvey A, Sudhamsu J, Shrivastava-Ranjan P, Hotard AL, Flint M, McMullan LK, Siegel D, Clarke MO, Mackman RL, Hui HC, Perron M, Ray AS, Cihlar T, Nichol ST, Spiropoulou CF. 2017. GS-5734 and its parent nucleoside analog inhibit Filo-, Pneumo-, and Paramyxoviruses. *Sci Rep* 7:43395.
19. Pruijssers AJ, George AS, Schä A, Baric RS, Denison MR, Sheahan TP. 2020. Remdesivir Inhibits SARS-CoV-2 in Human Lung Cells and Chimeric SARS-CoV Expressing the SARS-CoV-2 RNA Polymerase in Mice. *Cell Rep* 107940.
20. Pedersen NC, Perron M, Bannasch M, Montgomery E, Murakami E, Liepnieks M, Liu H. 2019. Efficacy and safety of the nucleoside analog GS-441524 for treatment of cats with naturally occurring feline infectious peritoniti. *J Feline Med Surg* 21:271–281.
21. Murphy BG, Perron M, Murakami E, Bauer K, Park Y, Eckstrand C, Liepnieks M, Pedersen NC. 2018. The nucleoside analog GS-441524 strongly inhibits feline

- infectious peritonitis (FIP) virus in tissue culture and experimental cat infection studies. *Vet Microbiol* 219:226–233.
22. Dickinson PJ, Bannasch M, Thomasy SM, Murthy VD, Vernau KM, Liepnieks M, Montgomery E, Knickelbein KE, Murphy B, Pedersen NC. 2020. Antiviral treatment using the adenosine nucleoside analogue GS-441524 in cats with clinically diagnosed neurological feline infectious peritonitis. *J Vet Intern Med* jvim.15780.
23. Li Y, Cao L, Li G, Cong F, Li Y, Sun J, Luo Y, Chen G. 2021. Remdesivir Metabolite GS-441524 Effectively Inhibits SARS-CoV-2 Infection in Mouse Models. *J Med Chem* <https://doi.org/10.1021/acs.jmedchem.0c01929>.
24. Lenze EJ, Mattar C, Zorumski CF, Stevens A, Schweiger J, Nicol GE, Miller JP, Yang L, Yingling M, Avidan MS, Reiersen AM. 2020. Fluvoxamine vs Placebo and Clinical Deterioration in Outpatients with Symptomatic COVID-19: A Randomized Clinical Trial. *JAMA* 324:2292–2300.
25. Wang T, Babusis D, Park Y, Niu C, Kim C, Zhao X, Lu B, Ma B, Muench RC, Sperger D, Ray AS, Murakami E. 2020. Species differences in liver accumulation and metabolism of nucleotide prodrug sofosbuvir. *Drug Metab Pharmacokinet* 35:334–340.
26. Food and Drug Administration. 2002. ZOVIRAX® (acyclovir).
27. Levene DL. 1973. The absorption of potassium chloride: Liquid vs. tablet. *Can Med Assoc J* 108:1480–1483.
28. Hammond JR, Stolk M, Archer RGE, McConnell K. 2004. Pharmacological analysis and molecular cloning of the canine equilibrative nucleoside transporter 1.

Eur J Pharmacol 491:9–19.

29. Agostini ML, Andres EL, Sims AC, Graham RL, Sheahan TP, Lu X, Clinton Smith E, Brett Case J, Feng JY, Jordan R, Ray AS, Cihlar T, Siegel D, Mackman RL, Clarke MO, Baric RS, Denison MR, Agostini CM, Gallagher T. 2018. Coronavirus Susceptibility to the Antiviral Remdesivir (GS-5734) Is Mediated by the Viral Polymerase and the Proofreading Exoribonuclease Downloaded from. MBio 9:ee00221-18.
30. Mahase E. 2021. Covid-19: Novavax vaccine efficacy is 86 % against UK variant and 60 % against South African variant. BMJ 2021.
31. Laskin OL. 1983. Clinical Pharmacokinetics of Acyclovir. Clin Pharmacokinet 8:187–201.
32. Krasny HC, De Miranda P, Blum MR, Elion GB. 1981. Pharmacokinetics and bioavailability of acyclovir in the dog. J Pharmacol Exp Ther 216:281–288.
