24 Remdesivir (RDV) is currently the only FDA-approved anti-viral drug for the treatment of  
25 COVID-19 despite exhibiting just modest efficacy in one double-blind, placebo-  
26 controlled randomized clinical trial (RCT) (1); other RCTs have thus far found no  
27 statistically significant improvement in mortality (2) or time to clinical improvement (3).  
28 As a phosphoramidate prodrug of the McGuigan class (4), RDV is structurally  
29 susceptible to conversion to its active nucleoside triphosphate (NTP; GS-443902) form  
30 by enzymes that are abundant in the liver (CES1/CTSA/HINT1) but minimally expressed  
31 in alveolar type 2 cells (AT2) (5), the cell type most susceptible to SARS-CoV-2  
32 infection (6). Preferential liver metabolism of RDV results in on-target dose limiting  
33 toxicity (DLT) that precludes dose escalation despite its modest clinical performance (7,  
34 8). Such shortcomings are exacerbated by the hydrophobic nature of RDV, which  
35 requires complex excipients that could implicate kidney function (9, 10). Another major  
36 drawback with RDV is its requisite intravenous (IV) administration (11), making  
37 outpatient therapy, early intervention, and prophylaxis impractical.

38

39 Cognizant of these limitations, we have asserted that the parent nucleoside of RDV,  
40 GS-441524, would be better suited for the treatment for COVID-19 (5). GS-441524 is  
41 the persistent, predominant metabolite in plasma following IV infusion of RDV in  
42 preclinical species (12–14) and in humans with a half-life ( $T_{1/2}$ ) of >24 h (8, 15). The  
43 extent to which GS-441524 contributes to the overall anti-SARS-CoV-2 activity of RDV  
44 when administered to patients remains unclear. In contrast to RDV, which is  
45 preferentially bioconverted to GS-443902 by liver-abundant enzymes (16, 17), GS-  
46 441524 is bioconverted to GS-443902 by nucleoside kinases (likely adenosine kinase,

47 ADK) that are broadly expressed across all tissues. Due to its demonstrably better  
48 safety profile (7, 18), a significant advantage that GS-441524 possesses over RDV is  
49 the possibility for dose escalation without liver-related DLTs, as this would increase the  
50 concentration of bioactive GS-443902 in AT2 cells. Cell-based studies have shown that  
51 GS-441524 is a potent inhibitor of SARS-CoV-2-infected cells, with EC<sub>50</sub> values on the  
52 same order of magnitude as that of RDV (EC<sub>50</sub>= 0.47-1.09 μM) (19). Efficacy studies  
53 conducted in cats with natural presentations feline infectious peritonitis (FIP) as a result  
54 of infection by the closely related feline coronavirus (FCoV) have demonstrated up to 96%  
55 cure rate with subcutaneously (SC) administered GS-441524 (20–22). Efficacy studies  
56 conducted in mice infected with either SARS-CoV-2 or murine hepatitis virus (MHV, a  
57 closely related coronavirus) have shown that GS-441524 is capable of reducing viral  
58 loads in pathologically relevant organs without obvious adverse events (23). Given the  
59 scarcity of simple outpatient treatment options for COVID-19 (24), these especially  
60 encouraging data warrant translation of GS-441524 to the clinic. Here, we provide  
61 pharmacokinetic (PK) evidence in dogs supporting the ability for GS-441524 to be  
62 investigated as an oral agent for COVID-19.

63

64 To validate our assertion that McGuigan prodrugs such as RDV are heavily subject to  
65 first-pass metabolism, we first conducted a single-dose, equimolar comparison between  
66 orally (PO) administered GS-441524 (6.5 mg/kg) and RDV (13 mg/kg) in dogs. Male  
67 beagles (N=1 per group) were administered excipient-less capsule formulations of either  
68 GS-441524 or RDV and plasma concentrations of GS-441524 were evaluated at  
69 predetermined timepoints (**Figure 1a**). No adverse events were observed in either

70 dosing group. As expected, plasma concentrations of GS-441524 following  
71 administration of RDV were poor, with  $C_{max}$  values roughly 25-fold lower than that  
72 observed when GS-441524 was administered directly (172 vs. 4580 ng/mL, respectively;  
73 **Figure 1a, c, Supplementary Data File 1**). Interestingly, there was an observable  
74 difference in  $T_{max}$  values, with plasma concentrations of GS-441524 peaking at  
75 approximately 3 h following RDV administration versus 1 h following direct dosing of  
76 GS-441524. This shift in  $T_{max}$  values with RDV PO administration suggests a  
77 mechanism of systemic release similar to that observed for the McGuigan prodrug  
78 sofosbuvir, wherein rapid hepatic extraction of intact prodrug forms a reservoir of active  
79 NTP and hydrolyzed nucleoside—the latter of which is then slowly released into  
80 systemic circulation (25). Given that plasma concentrations of GS-441524 following  
81 RDV administration are below the range of reported anti-SARS-CoV-2  $EC_{50}$  values and  
82 that long-term PO dosing of RDV at 13 mg/kg is almost certainly therapeutically  
83 prohibitive in humans due to hepatotoxicity concerns (8), these data allude to the  
84 infeasibility of administering RDV PO for COVID-19. At the same time, we find that  
85 direct PO administration of GS-441524 results in plasma concentration exceeding the  
86 range of reported anti-SARS-CoV-2  $EC_{50}$  values for at least 8 h (**Figure 1a,**  
87 **Supplementary Data File 1**). Peak concentrations of GS-441524 reached 15.45  $\mu$ M  
88 and were obtained at approximately 1 h (**Figure 1a, c**), indicating high oral absorption of  
89 GS-441524 in dog even in the absence of excipients.

90

91 Prior studies assessing the oral bioavailability (OBV, F%) of GS-441524 in dogs  
92 following both IV (2 mg/kg) and PO (5 mg/kg) administration have found that the drug is

93 efficiently absorbed, with an OBV of 85% (NCATS OpenData Portal). Such studies  
94 examined PO absorption of GS-441524 using a solution formulation prepared at a final  
95 concentration of 2.5 mg/mL. We sought to determine whether similarly favorable F%  
96 could be achieved using an excipient-less capsule formulation, which would greatly  
97 ease outpatient administration. The wide range of F% observed in other preclinical  
98 species (**Table 1**; NCATS OpenData Portal) and the unusual solubility properties of GS-  
99 441524 are reminiscent of that observed with the FDA-approved nucleoside analogue  
100 acyclovir (**Table 1**), which was ultimately formulated as an excipient-less tablet (26).  
101 Direct comparison of PK parameters between solution and capsule formulations of GS-  
102 441524 indicates a similar pattern of high drug absorption, with  $T_{max}$  values of 0.5 and 1  
103 h, respectively (**Figure 1b**). Between solution and capsule formulations, PK parameters  
104 were generally similar; it should be noted that the capsule dose was slightly higher than  
105 the solution dose (5 mg/kg vs. 6.5 mg/kg). Adjusting for sampling timeframes, these  
106 data indicate that the  $C_{max}$  value was higher with the solution formulation (5060 vs. 4580  
107 ng/mL) but the AUC value were somewhat higher with the capsule formulation (17916  
108 vs. 19151 ng/mL; **Figure 1c**). Such observations appear consistent with the general  
109 observation that liquid formulations tend to be more readily absorbed than their pill  
110 counterparts (27). Nevertheless, the estimated OBV using this capsule formulation  
111 remains high at about 76% (**Figure 1b**). These data hint at the feasibility of using an  
112 excipient-less pill formulation for GS-441524 for outpatient treatment.

113

114 There are some limitations associated with this study. First, the sample size in the  
115 capsule study is small, which may not capture possible variability associated with this

116 formulation. Second, nucleoside analogues generally tend to exhibit higher OBV in dogs  
117 than in other preclinical species perhaps due to the presence of a paracellular  
118 nucleoside transporter that is absent in humans and non-human primates (28). As a  
119 result, the OBV of nucleoside analogues in dogs tends to overestimate that observed in  
120 humans (**Supplementary Data File 2**). While not specifically explored in this study, it  
121 should be noted that—at the other end of the OBV spectrum—OBV of nucleoside  
122 analogues in non-human primates tend to under-predict that observed in humans  
123 (**Supplementary Data File 3**). Nevertheless, these data suggest the feasibility of using  
124 a simple, excipient-less capsule formulation of GS-441524. As a prodrug inhibitor of the  
125 SARS-CoV-2 RNA-dependent RNA polymerase (RdRp), GS-441524 is aptly poised to  
126 demonstrate consistent efficacy among new mutations of SARS-CoV-2, as RdRp is  
127 much less susceptible to efficacy-altering mutations than is the spike protein (29, 30).  
128 Thus, clinical translation of GS-441524 is imperative.

129

130

131

132

133

134

135

136

137

138

139

140 *Drug formulation.*

141 For capsule studies, GS-441524 and RDV were purchased at the highest commercially  
142 available quality from MedKoo Biosciences; purity was verified by ultra-performance  
143 liquid chromatography mass spectrometry (UPLC-MS) and nuclear magnetic resonance  
144 (NMR) spectroscopy ( $^1\text{H}$ ,  $^{13}\text{C}$ ) in-house. For capsule studies, gelatin capsules (size 5,  
145 XPRS Nutra) were tightly packed with either GS-441524 (65 mg) or RDV (136.74 mg)  
146 without additional excipients. For solution studies, GS-441524 was purchased at the  
147 highest commercially available from AK Scientific and characterized by NCATS.  
148 Formulations for PO and IV studies conducted by NCATS are described on the NCATS  
149 OpenData Portal. Briefly, GS-441524 was dissolved in a solution containing 5% ethanol,  
150 30% propylene glycol, 45% PEG-400, 20% water with 1 equivalent HCl for a final  
151 concentration of 2.5 mg/mL.

152

153 *Single dose GS-441524 and RDV in dogs via capsule formulation.*

154 All capsule form studies were performed at Charles River Laboratories (Wilmington, MA)  
155 with IACUC approval (#20236536). Fasted male adult beagles (10 kg; N=1 per  
156 compound) were administered either GS-441524 (6.5 mg/kg) or RDV (13 mg/kg).  
157 Plasma samples were taken for PK analysis at the following timepoints (h): -0.5, 0.5, 1,  
158 3, 6, 8, 24. Animals were monitored continuously by veterinarians for any clinically  
159 relevant abnormalities during dosing and sample collection. PO solution and IV studies  
160 were performed by NCATS as described on the NCATS OpenData Portal with relevant

161 committee and regulatory approval. Data from all studies were (re-)analyzed using  
162 PKSolver 2.0 and graphs were generated using GraphPad Prism 8.

163

#### 164 *Plasma pharmacokinetics*

165 For capsule studies, plasma levels of GS-441524 were analyzed at Covance, Inc  
166 (Princeton, NJ) on a fee-for-service basis using a liquid chromatography mass  
167 spectrometry (LC-MS) assay previously described for quantification of GS-441524  
168 following IV administration of RDV in NHP (12).

169

#### 170 **Author Contributions.**

171 V.C.Y. analyzed data and wrote the manuscript. S.K., K.A., D.K.G., and J.J.A. provided  
172 technical assistance. V.C.Y. and F.L.M. conceived and oversaw the study.

173

#### 174 **Acknowledgements.**

175 This work was supported by the COVID-19 Early Treatment Fund (CETF). S.K. is  
176 supported by the MD Anderson CPRIT Research Training Program Grant (RP170067)  
177 and the Larry Deaven PhD Fellowship in Biomedical Sciences. We thank Gilead  
178 Sciences for permission to use their assay established at Covance, Inc. to quantify GS-  
179 441524 in plasma and NCATS for conducting PK studies.

180

181

182

183



184

185

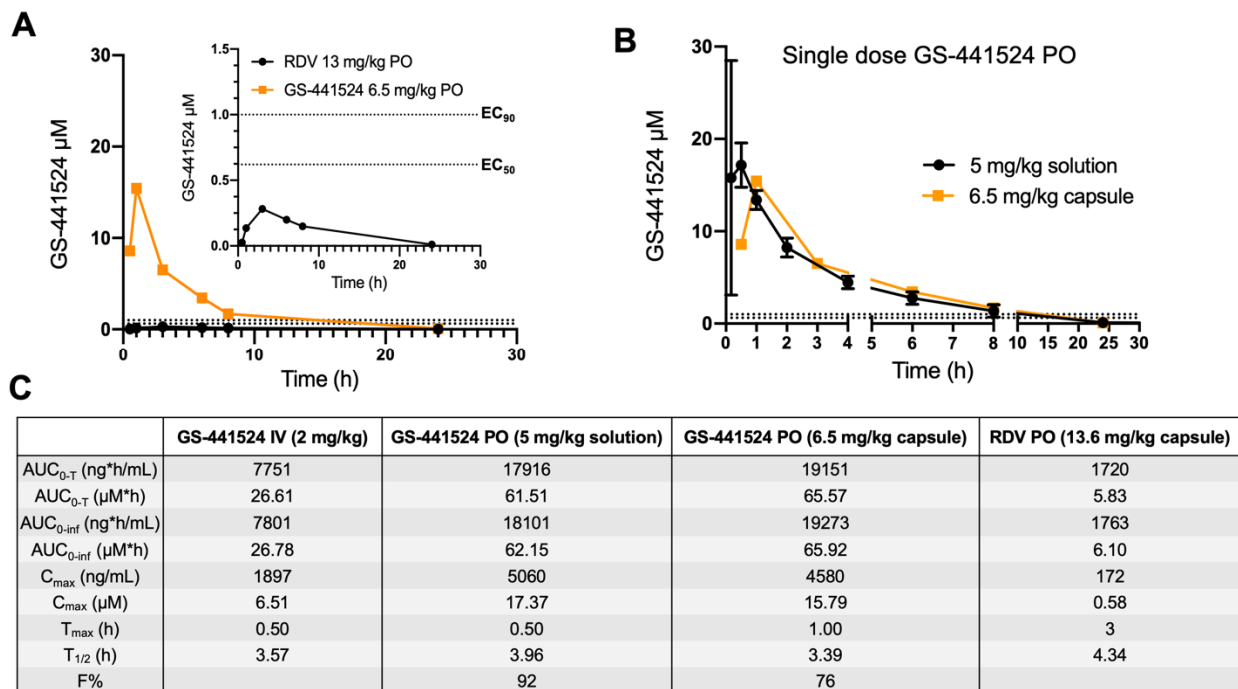

186

187 **Figure 1. Plasma concentrations of GS-441524 following a single oral dose of**

188 **remdesivir or GS-441524 in dogs. (A)** Head-to-head PK comparison following a single

189 equimolar dose of remdesivir (black, 13.6 mg/kg) and GS-441524 (orange, 6.5 mg/kg)

190 in male beagle dogs (N=1 per compound). Both compounds were administered in

191 capsule form. Plasma concentrations of GS-441524 following compound administration

192 are plotted for the following timepoints (h): 0.5, 1, 3, 6, 8, 24. A focused view of GS-

193 441524 concentrations following oral administration of remdesivir is shown in top right

194 corner. **(B)** Comparison of plasma concentrations of GS-441524 following oral

195 administration as a solution (black, 5 mg/kg; N=3) or as a capsule (orange, 6.5 mg/kg;

196 N=1). **(C)** Mean PK parameters following various routes of administration of GS-441524

197 and RDV. Raw values for GS-441524 dosed IV and PO dosed as a solution are

198 adapted from NCATS OpenData Portal and have been re-calculated to match the

199 sampling timeframe of the capsule studies (T=0.5-24 h). All PK parameters were  
200 calculated using PKSolver 2.0. In panels A and B, dotted lines correspond to EC<sub>50</sub>  
201 (bottom) and EC<sub>90</sub> (top) values reported for GS-441524 in SARS-CoV-2-infected Calu3  
202 cells (19).

203

204

205

| Species, F% | Acyclovir | GS-441524 |
|-------------|-----------|-----------|
| Human       | 10-20     | 15-30*    |
| Monkey      | 3.7       | 8.3       |
| Dog         | 54-90     | 85-93     |

209

210 **Table 1. Oral bioavailabilities of acyclovir and GS-441524 in preclinical species**  
211 **are similar.** GS-441524 exhibits a similar pattern of F% as acyclovir across preclinical  
212 species. F% for GS-441524 were obtained from the NCATS OpenData Portal and F%  
213 for acyclovir were obtained from the FDA fact sheet on Zovirax (human), Laskin et al.  
214 Clin. Pharm. (1983, monkey) (31) and Krasny et al. *J. Pharm. Exp. Ther.* (1981, dog)  
215 (32). \*Anticipated F% of GS-441524 in humans.

216

217

218

219

220

221

222

223

224 **References.**

- 225 1. Beigel JH, Tomashek KM, Dodd LE, Mehta AK, Zingman BS, Kalil AC, Hohmann  
226 E, Chu HY, Luetkemeyer A, Kline S, Lopez de Castilla D, Finberg RW, Dierberg K,  
227 Tapson V, Hsieh L, Patterson TF, Paredes R, Sweeney DA, Short WR, Touloumi  
228 G, Lye DC, Ohmagari N, Oh M, Ruiz-Palacios GM, Benfield T, Fätkenheuer G,  
229 Kortepeter MG, Atmar RL, Creech CB, Lundgren J, Babiker AG, Pett S, Neaton  
230 JD, Burgess TH, Bonnett T, Green M, Makowski M, Osinusi A, Nayak S, Lane HC.  
231 2020. Remdesivir for the Treatment of Covid-19 — Final Report. *N Engl J Med*  
232 <https://doi.org/10.1056/NEJMoa2007764>.
- 233 2. WHO Solidarity Trial Consortium. 2020. Repurposed Antiviral Drugs for Covid-19  
234 - Interim WHO Solidarity Trial Results. *N Engl J Med* 1–15.
- 235 3. Wang Y, Zhang D, Du G, Du R, Zhao J, Jin Y, Fu S, Gao L, Cheng Z, Lu Q, Hu Y,  
236 Luo G, Wang K, Lu Y, Li H, Wang S, Ruan S, Yang C, Mei C, Wang Y, Ding D,  
237 Wu F, Tang X, Ye X, Ye Y, Liu B, Yang J, Yin W, Wang A, Fan G, Zhou F, Liu Z,  
238 Gu X, Xu J, Shang L, Zhang Y, Cao L, Guo T, Wan Y, Qin H, Jiang Y, Jaki T,  
239 Hayden FG, Horby PW, Cao B, Wang C. 2020. Remdesivir in adults with severe  
240 COVID-19: a randomised, double-blind, placebo-controlled, multicentre trial.  
241 *Lancet* 395:1569–1578.
- 242 4. Mcguigan C, Devine KG, O’onnor TJ, Galpin SA, Jeffries DJ, Kinchington D.  
243 1990. Synthesis and evaluation of some novel phosphoramidate derivatives of 3’-  
244 azido-3’-deoxythymidine (AZT) as anti-HIV compounds *Antiviral Chemistry &*

- 245 Chemotherapy.
- 246 5. Yan VC, Muller FL. 2020. Advantages of the Parent Nucleoside GS-441524 over  
247 Remdesivir for Covid-19 Treatment. *ACS Med Chem Lett* 11:1361–1366.
- 248 6. Schaefer I-M, Padera RF, Solomon IH, Kanjilal S, Hammer MM, Hornick JL, Sholl  
249 LM. 2020. In situ detection of SARS-CoV-2 in lungs and airways of patients with  
250 COVID-19. *Mod Pathol* 33:2104–2114.
- 251 7. Xu Y, Barauskas O, Kim C, Babusis D, Murakami E, Korniyev D, Lee G, Stepan  
252 G, Perron M, Bannister R, Schultz BE, Sakowicz R, Porter D, Cihlar T, Feng JY.  
253 2020. Off-target In Vitro Profiling Demonstrates that Remdesivir Is a Highly  
254 Selective Antiviral Agent. *Antimicrob Agents Chemother*  
255 <https://doi.org/10.1128/aac.02237-20>.
- 256 8. Humeniuk R, Mathias A, Cao H, Osinusi A, Shen G, Chng E, Ling J, Vu A,  
257 German P. 2020. Safety, Tolerability, and Pharmacokinetics of Remdesivir, An  
258 Antiviral for Treatment of COVID-19, in Healthy Subjects. *Clin Transl Sci*  
259 *cts*.12840.
- 260 9. Yan VC, Muller FL. 2020. Captisol and GS-704277, but not GS-441524, are  
261 credible mediators of remdesivir's nephrotoxicity. *Antimicrob Agents Chemother*  
262 64:01920–1920.
- 263 10. European Medicines Agency. 2020. Remdesivir: Summary on compassionate use  
264 EMA/178637/2020 - Rev. 1.
- 265 11. Food and Drug Administration. 2020. VEKLURY® (remdesivir).
- 266 12. Warren TK, Jordan R, Lo MK, Ray AS, Mackman RL, Soloveva V, Siegel D,  
267 Perron M, Bannister R, Hui HC, Larson N, Strickley R, Wells J, Stuthman KS, Van

- 268 Tongeren SA, Garza NL, Donnelly G, Shurtleff AC, Retterer CJ, Gharaibeh D,  
269 Zamani R, Kenny T, Eaton BP, Grimes E, Welch LS, Gomba L, Wilhelmsen CL,  
270 Nichols DK, Nuss JE, Nagle ER, Kugelman JR, Palacios G, Doerffler E, Neville S,  
271 Carra E, Clarke MO, Zhang L, Lew W, Ross B, Wang Q, Chun K, Wolfe L,  
272 Babusis D, Park Y, Stray KM, Trancheva I, Feng JY, Barauskas O, Xu Y, Wong P,  
273 Braun MR, Flint M, McMullan LK, Chen S-S, Fearn R, Swaminathan S, Mayers  
274 DL, Spiropoulou CF, Lee WA, Nichol ST, Cihlar T, Bavari S. 2016. Therapeutic  
275 efficacy of the small molecule GS-5734 against Ebola virus in rhesus monkeys.  
276 *Nature* 531:381–385.
- 277 13. Sheahan TP, Sims AC, Graham RL, Menachery VD, Gralinski LE, Case JB, Leist  
278 SR, Pyrc K, Feng JY, Trantcheva I, Bannister R, Park Y, Babusis D, Clarke MO,  
279 Mackman RL, Spahn JE, Palmiotti CA, Siegel D, Ray AS, Cihlar T, Jordan R,  
280 Denison MR, Baric RS. 2017. Broad-spectrum antiviral GS-5734 inhibits both  
281 epidemic and zoonotic coronaviruses. *Sci Transl Med* 9:eaal3653.
- 282 14. Williamson BN, Feldmann F, Schwarz B, Meade-White K, Porter DP, Schulz J,  
283 Van Doremalen N, Leighton I, Yinda CK, Pérez-Pérez L, Okumura A, Lovaglio J,  
284 Hanley PW, Saturday G, Bosio CM, Anzick S, Barbian K, Cihlar T, Martens C,  
285 Scott DP, Munster VJ, De Wit E. 2020. Clinical benefit of remdesivir in rhesus  
286 macaques infected with SARS-CoV-2. *Nature* 585:273–276.
- 287 15. Tempestilli M, Caputi P, Avataneo V, Notari S, Forini O, Scorzolini L, Marchioni L,  
288 Bartoli TA, Castilletti C, Lalle E, Capobianchi MR, Nicastrì E, D'Avolio A, Ippolito  
289 G, Agrati C. 2020. Pharmacokinetics of remdesivir and GS-441524 in two critically  
290 ill patients who recovered from COVID-19. *J Antimicrob Chemother* dkaa239:1–4.

- 291 16. Murakami E, Wang T, Babusis D, Lepist E-I, Sauer D, Park Y, Vela JE, Shih R,  
292 Birkus G, Stefanidis D, Kim CU, Cho A, Ray AS. 2014. Metabolism and  
293 Pharmacokinetics of the Anti-Hepatitis C Virus Nucleotide Prodrug GS-6620.  
294 *Antimicrob Agents Chemother* 58:1943–1951.
- 295 17. Lawitz E, Hill J, Marbury T, Hazan D, Gruener D, Webster L, Majauskas R,  
296 Morrison R, DeMicco M, German P, Stefanidis D, Svaroskaia E, Arterburn S, Ray  
297 A, Rossi S, McHutchinson J, Rodriguez-Torres M. 2012. GS-6620, A Liver-  
298 Targeted Nucleotide Prodrug, Exhibits Antiviral Activity and Favorable Safety  
299 Profile Over 5 Days in Treatment Naïve Chronic HCV Genotype 1 SubjectsEASL  
300 47th Annual Meeting. EASL 47th Annual Meeting, Barcelona.
- 301 18. Lo MK, Jordan R, Arvey A, Sudhamsu J, Shrivastava-Ranjan P, Hotard AL, Flint  
302 M, McMullan LK, Siegel D, Clarke MO, Mackman RL, Hui HC, Perron M, Ray AS,  
303 Cihlar T, Nichol ST, Spiropoulou CF. 2017. GS-5734 and its parent nucleoside  
304 analog inhibit Filo-, Pneumo-, and Paramyxoviruses. *Sci Rep* 7:43395.
- 305 19. Pruijssers AJ, George AS, Schä A, Baric RS, Denison MR, Sheahan TP. 2020.  
306 Remdesivir Inhibits SARS-CoV-2 in Human Lung Cells and Chimeric SARS-CoV  
307 Expressing the SARS-CoV-2 RNA Polymerase in Mice. *Cell Rep* 107940.
- 308 20. Pedersen NC, Perron M, Bannasch M, Montgomery E, Murakami E, Liepnieks M,  
309 Liu H. 2019. Efficacy and safety of the nucleoside analog GS-441524 for  
310 treatment of cats with naturally occurring feline infectious peritoniti. *J Feline Med*  
311 *Surg* 21:271–281.
- 312 21. Murphy BG, Perron M, Murakami E, Bauer K, Park Y, Eckstrand C, Liepnieks M,  
313 Pedersen NC. 2018. The nucleoside analog GS-441524 strongly inhibits feline

- 314 infectiousperitonitis (FIP) virus in tissue culture and experimental cat infection  
315 studies. *Vet Microbiol* 219:226–233.
- 316 22. Dickinson PJ, Bannasch M, Thomasy SM, Murthy VD, Vernau KM, Liepnieks M,  
317 Montgomery E, Knickelbein KE, Murphy B, Pedersen NC. 2020. Antiviral  
318 treatment using the adenosine nucleoside analogue GS-441524 in cats with  
319 clinically diagnosed neurological feline infectious peritonitis. *J Vet Intern Med*  
320 *jvim*.15780.
- 321 23. Li Y, Cao L, Li G, Cong F, Li Y, Sun J, Luo Y, Chen G. 2021. Remdesivir  
322 Metabolite GS-441524 Effectively Inhibits SARS-CoV-2 Infection in Mouse  
323 Models. *J Med Chem* <https://doi.org/10.1021/acs.jmedchem.0c01929>.
- 324 24. Lenze EJ, Mattar C, Zorumski CF, Stevens A, Schweiger J, Nicol GE, Miller JP,  
325 Yang L, Yingling M, Avidan MS, Reiersen AM. 2020. Fluvoxamine vs Placebo and  
326 Clinical Deterioration in Outpatients with Symptomatic COVID-19: A Randomized  
327 Clinical Trial. *JAMA* 324:2292–2300.
- 328 25. Wang T, Babusis D, Park Y, Niu C, Kim C, Zhao X, Lu B, Ma B, Muench RC,  
329 Sperger D, Ray AS, Murakami E. 2020. Species differences in liver accumulation  
330 and metabolism of nucleotide prodrug sofosbuvir. *Drug Metab Pharmacokinet*  
331 35:334–340.
- 332 26. Food and Drug Administration. 2002. ZOVIRAX® (acyclovir).
- 333 27. Levene DL. 1973. The absorption of potassium chloride: Liquid vs. tablet. *Can*  
334 *Med Assoc J* 108:1480–1483.
- 335 28. Hammond JR, Stolk M, Archer RGE, McConnell K. 2004. Pharmacological  
336 analysis and molecular cloning of the canine equilibrative nucleoside transporter 1.

- 337 Eur J Pharmacol 491:9–19.
- 338 29. Agostini ML, Andres EL, Sims AC, Graham RL, Sheahan TP, Lu X, Clinton Smith  
339 E, Brett Case J, Feng JY, Jordan R, Ray AS, Cihlar T, Siegel D, Mackman RL,  
340 Clarke MO, Baric RS, Denison MR, Agostini CM, Gallagher T. 2018. Coronavirus  
341 Susceptibility to the Antiviral Remdesivir (GS-5734) Is Mediated by the Viral  
342 Polymerase and the Proofreading Exoribonuclease Downloaded from. MBio  
343 9:ee00221-18.
- 344 30. Mahase E. 2021. Covid-19: Novavax vaccine efficacy is 86 % against UK  
345 variant and 60 % against South African variant. BMJ 2021.
- 346 31. Laskin OL. 1983. Clinical Pharmacokinetics of Acyclovir. Clin Pharmacokinet  
347 8:187–201.
- 348 32. Krasny HC, De Miranda P, Blum MR, Elion GB. 1981. Pharmacokinetics and  
349 bioavailability of acyclovir in the dog. J Pharmacol Exp Ther 216:281–288.
- 350
